# Supplementary material for: Tribochemical synergy between phosphate-intercalated layered double hydroxide additives and super high oleic safflower oil on sliding contacts
Source: Royal Society of Chemistry journal article supplement (doi:10.1039/d2cp01601j), 2022-01-01
Supplement: d2cp01601j1.pdf [file d2cp01601j1.pdf]

## SUPPORTING INFORMATION

### Tribochemical synergy between phosphate-intercalated layered double hydroxide additives and super high oleic safflower oil on sliding contacts †

Tuong Ly Kiet Dao,<sup>a</sup> Kiet Anh Tieu<sup>\*a</sup> and Bach Hoang Tran<sup>a</sup>

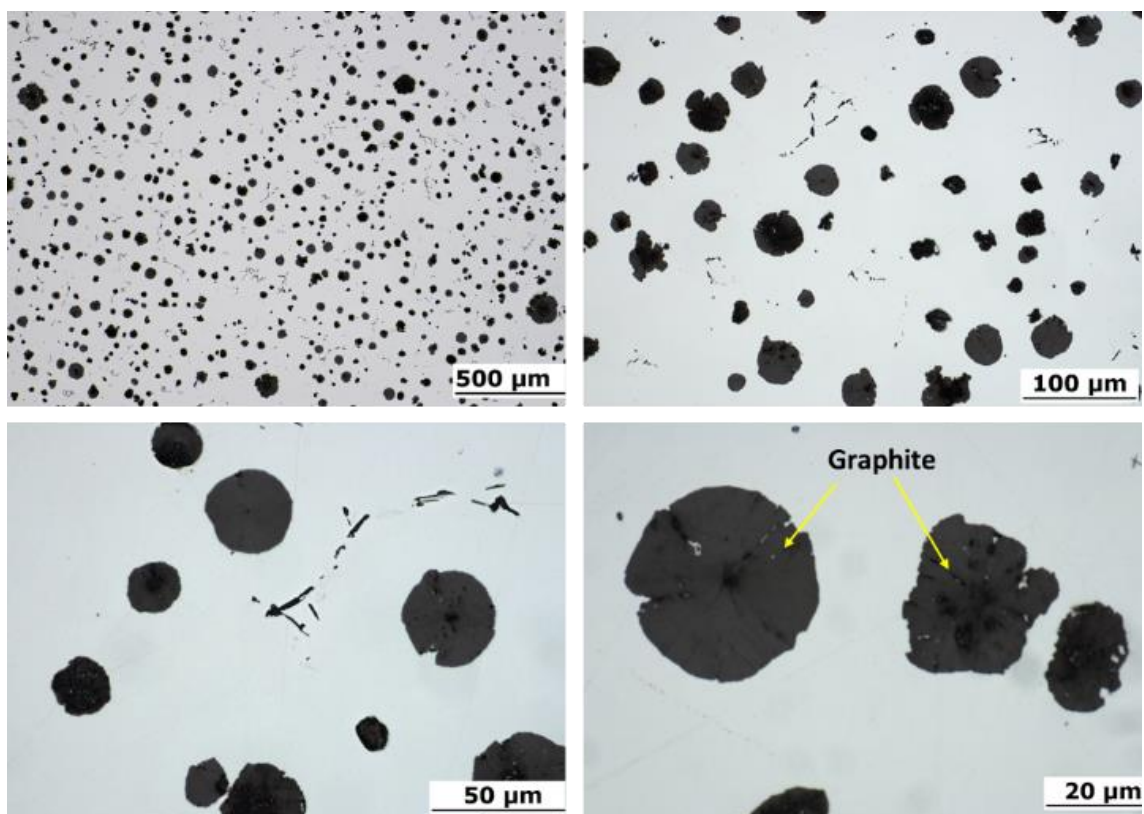

Fig. S1. Optical micrographs of polished cast iron.

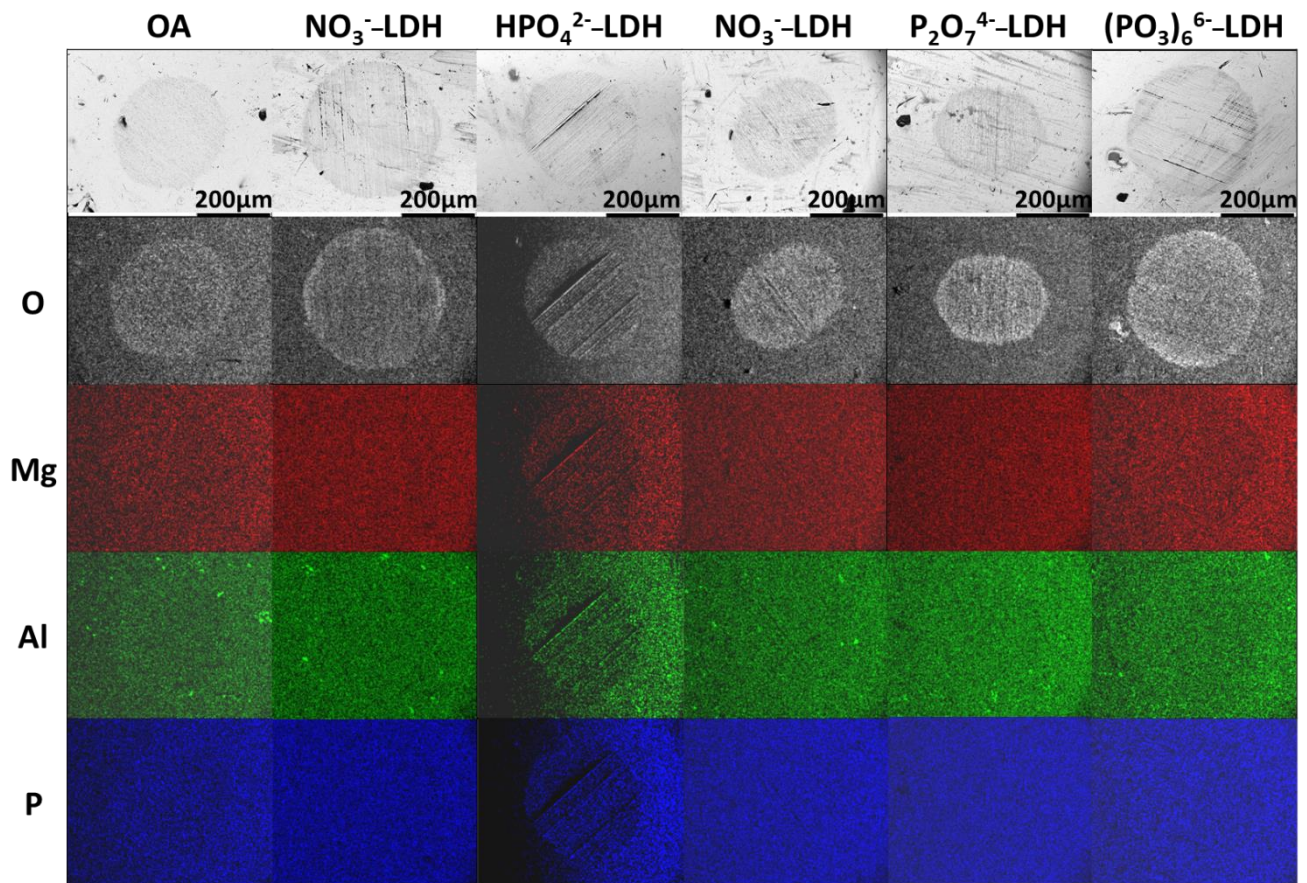

Fig. S2. SEM micrographs and elemental distribution on worn scars of and 0.5 wt% of different LDHs in OA.

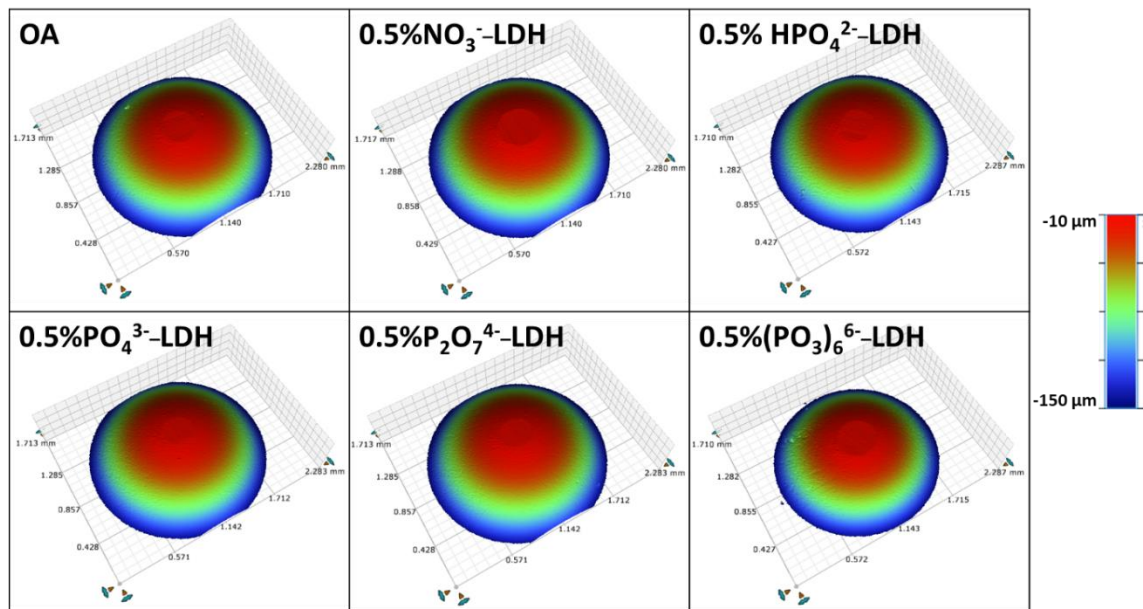

Fig. S3. 3D profile of wear scars of OA and 0.5 wt% of different LDHs in OA.

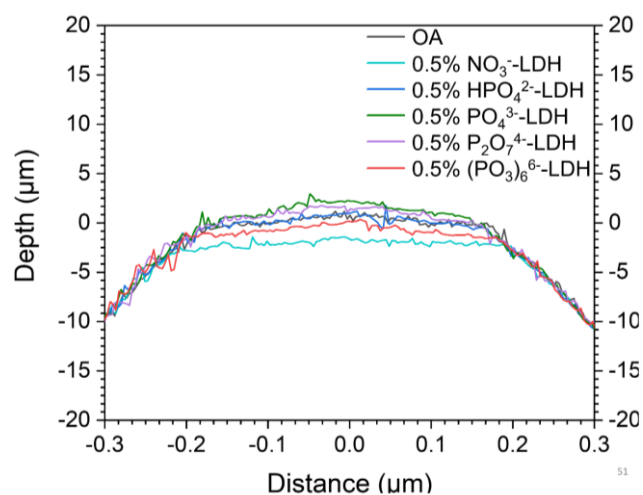

Fig. S4. 2D profile of wear scars of OA and 0.5 wt% of different LDHs in OA.

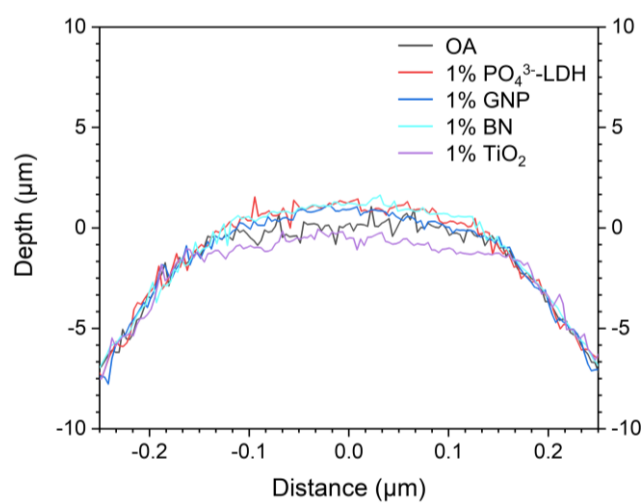

Fig. S5. 2D profile of wear scars of OA, 1 wt% PO<sub>4</sub><sup>3-</sup>-LDH, GNP, BN, and TiO<sub>2</sub> in OA samples.

**Table S1.** pH values of the suspensions and stirring time during anion exchange.

| Sample                  | HPO <sub>4</sub> <sup>2-</sup> -LDH | PO <sub>4</sub> <sup>3-</sup> -LDH | P <sub>2</sub> O <sub>7</sub> <sup>4-</sup> -LDH | (PO <sub>3</sub> ) <sub>6</sub> <sup>6-</sup> -LDH |
|-------------------------|-------------------------------------|------------------------------------|--------------------------------------------------|----------------------------------------------------|
| pH                      | 6.5                                 | 12.5                               | 7                                                | 7.5                                                |
| Stirring duration (hrs) | 16                                  | 48                                 | 16                                               | 16                                                 |

**Table S2.** Chemical composition (other than Fe) of GCr15 chrome steel and cast iron.

| Composition (%) | C        | Si        | Mn      | Mg        | P     | S     | Cr      | Mo  |
|-----------------|----------|-----------|---------|-----------|-------|-------|---------|-----|
| GCr15 steel     | 0.95-1.1 | 0.15-0.35 | 0.5     | -         | 0.025 | 0.025 | 1.3-1.6 | 0.8 |
| Cast iron       | 3.25-3.7 | 2.4-3.0   | 0.1-0.4 | 0.04-0.07 | -     | -     | -       | -   |

**Table S3.** Concentrations of sodium phosphates salts.

| Sample                                                 | Average steady-state COF | COF reduction | Average wear volume loss (x10 <sup>-3</sup> mm <sup>3</sup> ) | Reduction of wear volume loss |
|--------------------------------------------------------|--------------------------|---------------|---------------------------------------------------------------|-------------------------------|
| OA                                                     | 0.093 ± 0.001            | -             | 0.150                                                         | -                             |
| 0.62 wt% NaNO <sub>3</sub>                             | 0.102 ± 0.003            | -10%          | 0.411                                                         | -175%                         |
| 0.5 wt% Na <sub>2</sub> HPO <sub>4</sub>               | 0.098 ± 0.001            | -6%           | 0.172                                                         | -15%                          |
| 0.92 wt% Na <sub>3</sub> PO <sub>4</sub>               | 0.097 ± 0.001            | -5%           | 0.093                                                         | 38%                           |
| 0.81 wt% Na <sub>4</sub> P <sub>2</sub> O <sub>7</sub> | 0.099 ± 0.002            | -7%           | 0.090                                                         | 40%                           |
| 0.74 wt% (NaPO <sub>3</sub> ) <sub>6</sub>             | 0.098 ± 0.003            | -6%           | 0.173                                                         | -16%                          |
